# Supplementary material
Source: publisher site journal article supplement (https://www.dovepress.com/article/586583)
Supplement: Supplementary file 1 [file 586583%20Supplementary%20Material.docx]

**Supplementary Methods**

**Targeted Quantitative Analysis of Tryptophan Pathway Metabolites**

Metabolites were quantitatively analyzed using ultra-performance liquid chromatography-tandem mass spectrometry (UPLC-MS/MS). Following methanol extraction and centrifugation, the supernatant was collected for analysis. Chromatographic separation was performed on a Waters ACQUITY UPLC HSS T3 C18 column (1.8 μm,100 mm × 2.1 mm) with mobile phases of 0.1% formic acid in water (A) and 0.1% formic acid in acetonitrile (B) using gradient elution. The flow rate was 0.35 mL/min at 40°C. Mass spectrometric detection employed an electrospray ionization (ESI) source in both positive and negative ion modes, with ion pairs detected based on optimized declustering potential and collision energy parameters.

**Supplementary Table 1. Results of Adonis analysis of** **β diversity based on Bray-Curtis distance**

|  | Df | SumsOfSqs | MeanSqs | F.Model | R2 | Pr(>F) |
| --- | --- | --- | --- | --- | --- | --- |
| LITUS | 1 | 0.3492 | 0.3492 | 1.1931 | 0.0785 | 0.195 |
| Residuals | 14 | 4.0972 | 0.2927 | NA | 0.9215 | NA |
| Total | 15 | 4.4463 | NA | NA | 1 | NA |

Note: Adonis analysis is based on Bray-Curtis distances; Adonis analysis was performed using the vegan package in R (999 permutations). Abbreviations: “NA” indicates no corresponding statistics.


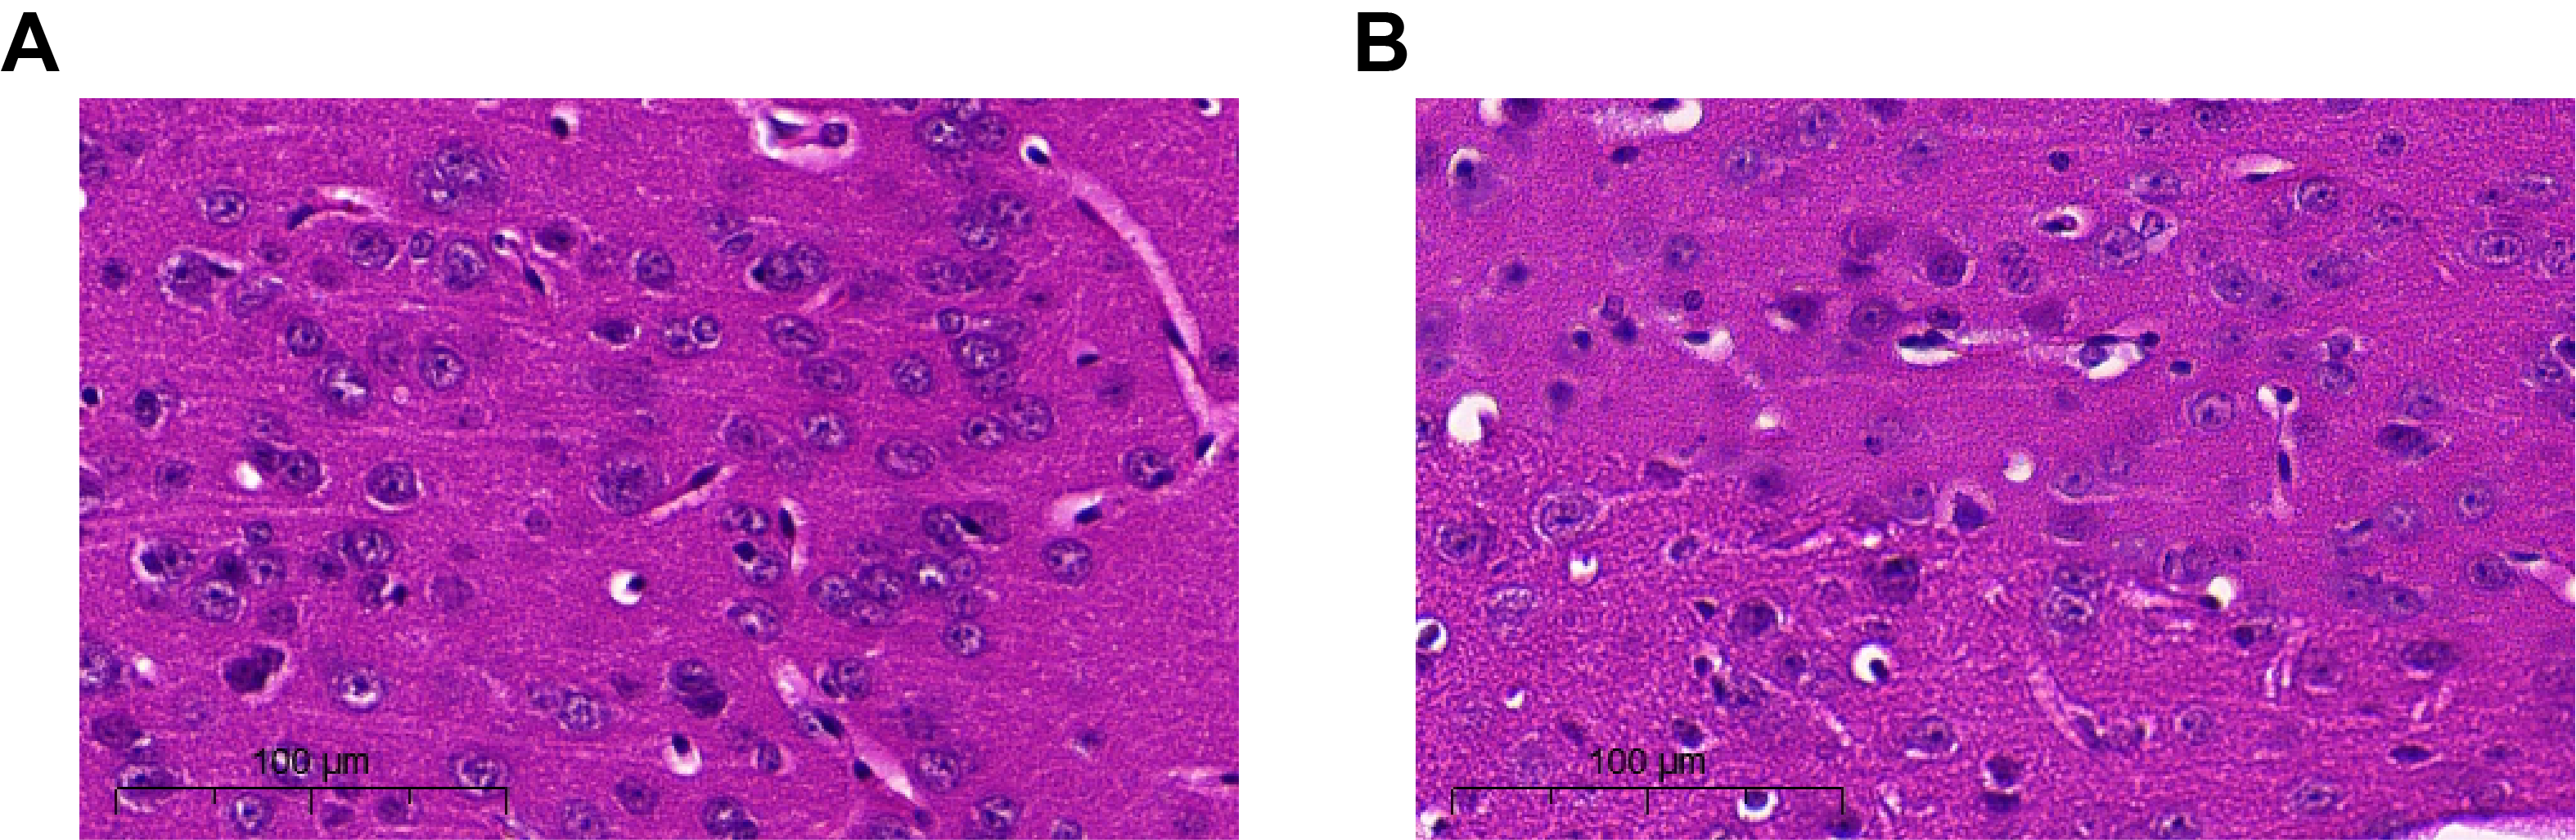


Supplementary Figure 1 Histological analysis (H&E staining) of the prelimbic (PRL) brain area. (A) LIFUS2 group and (B) SHAM group. Representative images show no tissue damage or hemorrhage in the PRL area after 2 weeks of stimulation in the LIFUS2 group compared to the SHAM group. Scale bar = 100 μm.

Abbreviations: LIFUS2, Low-Intensity Transcranial Focused Ultrasound Stimulation with a PRF of 1.5 kHz.
